# Supplementary material for: Impact of prebiopsy MRI on prostate cancer staging: Results from the Norwegian Prostate Cancer Registry
Source: PubMed Central journal article supplement (PMC10071082; doi:10.1002/bco2.214), 2023-01-10

Supplementary Figure 2.

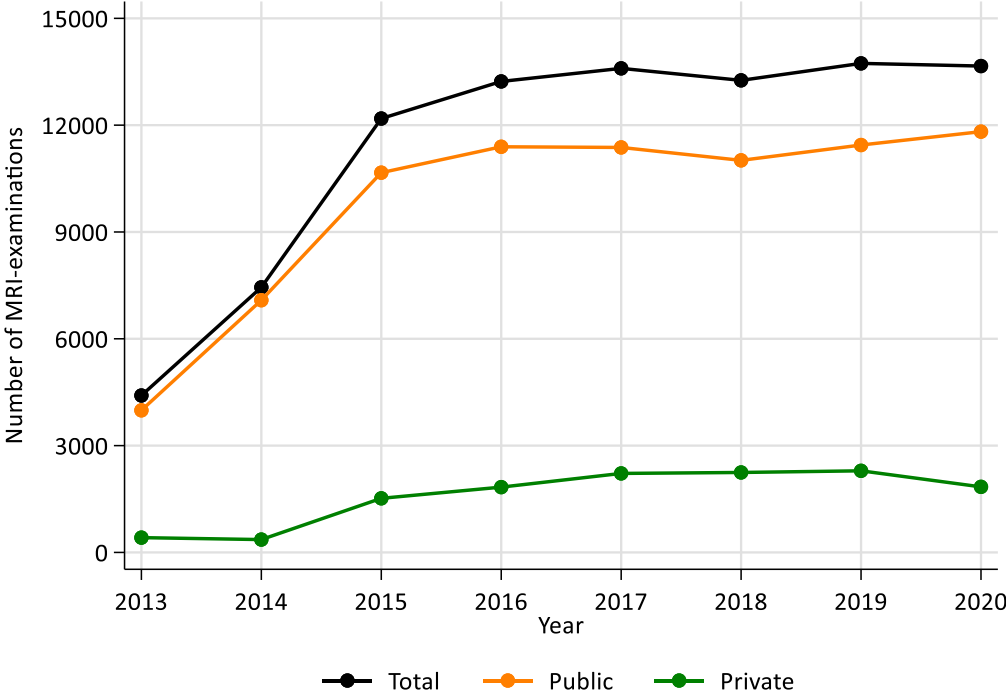

Supplement: BCO2-4-331-s001.pdf [file BCO2-4-331-s001.pdf]
